# Supplementary material
Source: MDPI journal article supplement (https://www.mdpi.com/1996-1073/16/10/4245)
Supplement: s1 [file s1]

# A CRITIC–TOPSIS Multi-Criteria Decision-Making Approach for Optimum Site Selection for Solar PV Farm

The detail calculation for all the four multi criteria decision making methods i-e CRITIC, TOPSIS, SAW AND MOORA are given in the following sections.

## S1. Calculation for CRITIC Method:

**Table S1.** Decision matrix.

|    | C1   | C2   | C3   | C4   | C5  | C6    | C7      | C8     | C9     | C10 | C11     | C12 | C13    | C14  | C15    | C16     |
|----|------|------|------|------|-----|-------|---------|--------|--------|-----|---------|-----|--------|------|--------|---------|
| A1 | 5.43 | 18.6 | 3.1  | 54.9 | 8.7 | 11020 | 519.6   | 877.56 | 287476 | 30  | 2624238 | 4.8 | 528964 | 8314 | 76.393 | 2354320 |
| A2 | 5.94 | 28.2 | 3.6  | 60.4 | 9.2 | 9505  | 435.09  | 1072.6 | 202147 | 35  | 1845308 | 5.8 | 456221 | 7170 | 67.801 | 9261257 |
| A3 | 5.6  | 26.5 | 4.4  | 52   | 9.2 | 8808  | 395.043 | 930.8  | 162935 | 38  | 1487360 | 6.5 | 422793 | 6645 | 62.45  | 1304688 |
| A4 | 5.78 | 25.7 | 3    | 26.6 | 9.2 | 10074 | 467.45  | 1144.3 | 234207 | 33  | 2137970 | 5.4 | 483552 | 7600 | 72.379 | 8660885 |
| A5 | 5.85 | 26.8 | 3.57 | 39.1 | 9.4 | 9220  | 428.92  | 1072.9 | 186117 | 36  | 1698977 | 6.1 | 442555 | 6956 | 66.632 | 858935  |

**Table S2.** Normalization matrix.

|      | C1    | C2     | C3     | C4     | C5     | C6     | C7     | C8      | C9     | C10         | C11    | C12    | C13    | C14    | C15    | C16     |
|------|-------|--------|--------|--------|--------|--------|--------|---------|--------|-------------|--------|--------|--------|--------|--------|---------|
| A1   | 0     | 1      | 0.0714 | 0.1627 | 0      | 1      | 0      | 1       | 1      | 1           | 1      | 1      | 1      | 0      | 0      | 0.17797 |
| A2   | 1     | 0      | 0.4286 | 0      | 0.7143 | 0.3151 | 0.6785 | 0.2688  | 0.3149 | 0.375       | 0.3149 | 0.4118 | 0.3149 | 0.6854 | 0.6162 | 1       |
| A3   | 0.333 | 0.1771 | 1      | 0.2485 | 0.7143 | 0      | 1      | 0.8004  | 0      | 0           | 0      | 0      | 0      | 1      | 1      | 0.05305 |
| A4   | 0.686 | 0.2604 | 0      | 1      | 0.7143 | 0.5723 | 0.4187 | 0       | 0.5723 | 0.625       | 0.5723 | 0.6471 | 0.5723 | 0.4278 | 0.2879 | 0.92855 |
| A5   | 0.824 | 0.1458 | 0.4071 | 0.6302 | 1      | 0.1863 | 0.728  | 0.26768 | 0.1861 | 0.25        | 0.1861 | 0.2353 | 0.1861 | 0.8137 | 0.7001 | 0       |
| STDV | 0.401 | 0.3934 | 0.3959 | 0.4037 | 0.3725 | 0.3878 | 0.3773 | 0.41604 | 0.3878 | 0.381198767 | 0.3878 | 0.3844 | 0.3878 | 0.3878 | 0.3861 | 0.4909  |

**Table S3.** Correlation between Criteria.

|     | C1     | C2    | C3    | C4    | C5    | C6     | C7    | C8     | C9     | C10    | C11    | C12    | C13    | C14   | C15    | C16   |
|-----|--------|-------|-------|-------|-------|--------|-------|--------|--------|--------|--------|--------|--------|-------|--------|-------|
| C1  | 1      | -0.86 | 0.02  | 0.196 | 0.801 | -0.511 | 0.483 | -0.858 | -0.511 | -0.441 | -0.511 | -0.413 | -0.511 | 0.51  | 0.392  | 0.542 |
| C2  | -0.859 | 1     | -0.48 | -0.14 | -0.92 | 0.851  | -0.85 | 0.6733 | 0.8515 | 0.8114 | 0.852  | 0.7875 | 0.8515 | -0.85 | -0.774 | -0.33 |
| C3  | 0.0201 | -0.5  | 1     | -0.41 | 0.388 | -0.828 | 0.853 | 0.3106 | -0.828 | -0.868 | -0.828 | -0.873 | -0.828 | 0.83  | 0.9089 | -0.42 |
| C4  | 0.1965 | -0.14 | -0.41 | 1     | 0.397 | 0.009  | -0.05 | -0.631 | 0.0093 | 0.0433 | 0.009  | 0.0345 | 0.0093 | -0.01 | -0.137 | 0.112 |
| C5  | 0.8014 | -0.92 | 0.388 | 0.397 | 1     | -0.836 | 0.801 | -0.706 | -0.836 | -0.792 | -0.836 | -0.786 | -0.836 | 0.84  | 0.7356 | 0.079 |
| C6  | -0.511 | 0.851 | -0.83 | 0.009 | -0.84 | 1      | -1    | 0.2562 | 1      | 0.9966 | 1      | 0.9937 | 1      | -1    | -0.986 | 0.169 |
| C7  | 0.4827 | -0.85 | 0.853 | -0.05 | 0.801 | -0.996 | 1     | -0.227 | -0.996 | -0.996 | -0.996 | -0.991 | -0.996 | 1     | 0.99   | -0.13 |
| C8  | -0.858 | 0.673 | 0.311 | -0.63 | -0.71 | 0.256  | -0.23 | 1      | 0.2564 | 0.1831 | 0.256  | 0.1586 | 0.2564 | -0.26 | -0.099 | -0.64 |
| C9  | -0.511 | 0.852 | -0.83 | 0.009 | -0.84 | 1      | -1    | 0.2564 | 1      | 0.9966 | 1      | 0.9936 | 1      | -1    | -0.986 | 0.169 |
| C10 | -0.441 | 0.811 | -0.87 | 0.043 | -0.79 | 0.997  | -1    | 0.1831 | 0.9966 | 1      | 0.997  | 0.9986 | 0.9966 | -1    | -0.995 | 0.216 |
| C11 | -0.511 | 0.852 | -0.83 | 0.009 | -0.84 | 1      | -1    | 0.2564 | 1      | 0.9966 | 1      | 0.9936 | 1      | -1    | -0.986 | 0.169 |
| C12 | -0.413 | 0.788 | -0.87 | 0.034 | -0.79 | 0.994  | -0.99 | 0.1586 | 0.9936 | 0.9986 | 0.994  | 1      | 0.9936 | -0.99 | -0.994 | 0.265 |
| C13 | -0.511 | 0.852 | -0.83 | 0.009 | -0.84 | 1      | -1    | 0.2564 | 1      | 0.9966 | 1      | 0.9936 | 1      | -1    | -0.986 | 0.169 |
| C14 | 0.5113 | -0.85 | 0.828 | -0.01 | 0.836 | -1     | 0.996 | -0.256 | -1     | -0.997 | -1     | -0.994 | -1     | 1     | 0.9863 | -0.17 |
| C15 | 0.392  | -0.77 | 0.909 | -0.14 | 0.736 | -0.986 | 0.99  | -0.099 | -0.986 | -0.995 | -0.986 | -0.994 | -0.986 | 0.99  | 1      | -0.25 |
| C16 | 0.542  | -0.33 | -0.42 | 0.112 | 0.079 | 0.169  | -0.13 | -0.637 | 0.1691 | 0.2158 | 0.169  | 0.2646 | 0.1691 | -0.17 | -0.248 | 1     |

## S2. Calculation for TOPSIS method

**Table S4.** Normalized Performance matrix.

|    | C1    | C2    | C3    | C4    | C5     | C6     | C7   | C8    | C9     | C10   | C11   | C12   | C13   | C14   | C15   | C16   |
|----|-------|-------|-------|-------|--------|--------|------|-------|--------|-------|-------|-------|-------|-------|-------|-------|
| A1 | 0.424 | 0.328 | 0.388 | 0.51  | 0.4255 | 0.5052 | 0.52 | 0.383 | 0.5874 | 0.389 | 0.587 | 0.373 | 0.505 | 0.505 | 0.493 | 0.181 |
| A2 | 0.464 | 0.497 | 0.451 | 0.561 | 0.45   | 0.4357 | 0.43 | 0.468 | 0.413  | 0.454 | 0.413 | 0.451 | 0.436 | 0.436 | 0.438 | 0.713 |
| A3 | 0.438 | 0.467 | 0.551 | 0.483 | 0.45   | 0.4038 | 0.39 | 0.406 | 0.3329 | 0.492 | 0.333 | 0.506 | 0.404 | 0.404 | 0.403 | 0.1   |
| A4 | 0.452 | 0.453 | 0.376 | 0.247 | 0.45   | 0.4618 | 0.46 | 0.5   | 0.4785 | 0.428 | 0.479 | 0.42  | 0.462 | 0.462 | 0.467 | 0.667 |
| A5 | 0.457 | 0.472 | 0.447 | 0.363 | 0.4598 | 0.4227 | 0.43 | 0.468 | 0.3803 | 0.467 | 0.38  | 0.474 | 0.423 | 0.423 | 0.43  | 0.066 |

**Table S5.** Weighted Normalized Matrix.

|    | C1    | C2    | C3    | C4    | C5     | C6     | C7   | C8    | C9     | C10   | C11   | C12   | C13   | C14   | C15   | C16   |
|----|-------|-------|-------|-------|--------|--------|------|-------|--------|-------|-------|-------|-------|-------|-------|-------|
| A1 | 0.029 | 0.019 | 0.028 | 0.032 | 0.0279 | 0.0273 | 0.04 | 0.026 | 0.0318 | 0.021 | 0.032 | 0.02  | 0.027 | 0.036 | 0.035 | 0.013 |
| A2 | 0.031 | 0.029 | 0.032 | 0.035 | 0.0295 | 0.0236 | 0.03 | 0.031 | 0.0224 | 0.024 | 0.022 | 0.024 | 0.024 | 0.031 | 0.031 | 0.053 |
| A3 | 0.029 | 0.027 | 0.04  | 0.03  | 0.0295 | 0.0219 | 0.03 | 0.027 | 0.018  | 0.026 | 0.018 | 0.027 | 0.022 | 0.029 | 0.028 | 0.007 |
| A4 | 0.03  | 0.026 | 0.027 | 0.016 | 0.0295 | 0.025  | 0.03 | 0.034 | 0.0259 | 0.023 | 0.026 | 0.022 | 0.025 | 0.033 | 0.033 | 0.05  |
| A5 | 0.031 | 0.027 | 0.032 | 0.023 | 0.0302 | 0.0229 | 0.03 | 0.031 | 0.0206 | 0.025 | 0.021 | 0.025 | 0.023 | 0.03  | 0.03  | 0.005 |

### S3. SAW Method

**Table S6.** Normalized Decision Matrix.

|    | B     | NB    | B     | NB    | B     | B     | NB    | NB    | B     | NB    | B     | NB    | B     | NB    | NB    | B     |
|----|-------|-------|-------|-------|-------|-------|-------|-------|-------|-------|-------|-------|-------|-------|-------|-------|
|    | C1    | C2    | C3    | C4    | C5    | C6    | C7    | C8    | C9    | C10   | C11   | C12   | C13   | C14   | C15   | C16   |
| A1 | 0.914 | 1     | 0.705 | 0.485 | 0.926 | 1     | 0.76  | 1     | 1     | 1     | 1     | 1     | 1     | 0.799 | 0.817 | 0.254 |
| A2 | 1     | 0.66  | 0.818 | 0.44  | 0.979 | 0.863 | 0.908 | 0.818 | 0.703 | 0.857 | 0.703 | 0.828 | 0.862 | 0.927 | 0.921 | 1     |
| A3 | 0.943 | 0.702 | 1     | 0.512 | 0.979 | 0.799 | 1     | 0.943 | 0.567 | 0.789 | 0.567 | 0.738 | 0.799 | 1     | 1     | 0.141 |
| A4 | 0.973 | 0.724 | 0.682 | 1     | 0.979 | 0.914 | 0.845 | 0.767 | 0.815 | 0.909 | 0.815 | 0.889 | 0.914 | 0.874 | 0.863 | 0.935 |
| A5 | 0.985 | 0.694 | 0.811 | 0.68  | 1     | 0.837 | 0.921 | 0.818 | 0.647 | 0.833 | 0.647 | 0.787 | 0.837 | 0.955 | 0.937 | 0.093 |

STEP 3: Is to calculate the weighted sum and rank the alternatives

**Table S7.** Weighted Sum Matix.

| W   | 0.067 | 0.058 | 0.072 | 0.063 | 0.066 | 0.054 | 0.069 | 0.067 | 0.054 | 0.053 | 0.054 | 0.053 | 0.054 | 0.071 | 0.071 | 0.074 |          |          |            |
|-----|-------|-------|-------|-------|-------|-------|-------|-------|-------|-------|-------|-------|-------|-------|-------|-------|----------|----------|------------|
|     | B     | NB    | B     | NB    | B     | B     | NB    | NB    | B     | NB    | B     | NB    | B     | NB    | NB    | B     |          |          |            |
|     | C1    | C2    | C3    | C4    | C5    | C6    | C7    | C8    | C9    | C10   | C11   | C12   | C13   | C14   | C15   | C16   | SUM      | RAN<br>K |            |
| A 1 | 0.061 | 0.058 | 0.051 | 0.031 | 0.061 | 0.054 | 0.052 | 0.067 | 0.054 | 0.053 | 0.054 | 0.053 | 0.054 | 0.056 | 0.058 | 0.019 | 0.836599 | 3        | ABHA       |
| A 2 | 0.067 | 0.038 | 0.059 | 0.028 | 0.064 | 0.047 | 0.062 | 0.055 | 0.038 | 0.046 | 0.038 | 0.044 | 0.047 | 0.065 | 0.065 | 0.074 | 0.837499 | 2        | JEDDAH     |
| A 3 | 0.063 | 0.04  | 0.072 | 0.032 | 0.064 | 0.043 | 0.069 | 0.063 | 0.031 | 0.042 | 0.031 | 0.039 | 0.043 | 0.071 | 0.071 | 0.01  | 0.785274 | 4        | DAMMA<br>M |
| A 4 | 0.065 | 0.042 | 0.049 | 0.063 | 0.064 | 0.049 | 0.058 | 0.052 | 0.044 | 0.048 | 0.044 | 0.048 | 0.049 | 0.062 | 0.061 | 0.069 | 0.86821  | 1        | RIYADH     |
| A 5 | 0.066 | 0.04  | 0.058 | 0.043 | 0.066 | 0.045 | 0.063 | 0.055 | 0.035 | 0.044 | 0.035 | 0.042 | 0.045 | 0.068 | 0.066 | 0.007 | 0.778854 | 5        | ALAHSA     |

### S4. MOORA METHOD

STEP 1. Form the decision matrix

**Table S8.** Decision Matrix.

|     | B    | NB   | B    | NB   | B   | B     | NB      | NB     | B      | NB  | B       | NB  | B      | NB   | NB     | B       |
|-----|------|------|------|------|-----|-------|---------|--------|--------|-----|---------|-----|--------|------|--------|---------|
|     | C1   | C2   | C3   | C4   | C5  | C6    | C7      | C8     | C9     | C10 | C11     | C12 | C13    | C14  | C15    | C16     |
| A 1 | 5.43 | 18.6 | 3.1  | 54.9 | 8.7 | 11020 | 519.6   | 877.56 | 287476 | 30  | 2624238 | 4.8 | 528964 | 8314 | 76.393 | 2354320 |
| A 2 | 5.94 | 28.2 | 3.6  | 60.4 | 9.2 | 9505  | 435.09  | 1072.6 | 202147 | 35  | 1845308 | 5.8 | 456221 | 7170 | 67.801 | 9261257 |
| A 3 | 5.6  | 26.5 | 4.4  | 52   | 9.2 | 8808  | 395.043 | 930.8  | 162935 | 38  | 1487360 | 6.5 | 422793 | 6645 | 62.45  | 1304688 |
| A 4 | 5.78 | 25.7 | 3    | 26.6 | 9.2 | 10074 | 467.45  | 1144.3 | 234207 | 33  | 2137970 | 5.4 | 483552 | 7600 | 72.379 | 8660885 |
| A 5 | 5.85 | 26.8 | 3.57 | 39.1 | 9.4 | 9220  | 428.92  | 1072.9 | 186117 | 36  | 1698977 | 6.1 | 442555 | 6956 | 66.632 | 858935  |

STEP 2. CALCULATE THE PERFORMANCE SCORE  
STEP 3. CALCULATE THE NORMALISED MATRIX  
STEP 4. CALCULATET THE DISTANCE TO IDEAL SOLUTION  
STEP 5. RANK THE ALTERNATIVES.

Table S9. Performance score.

|    | B     | NB    | B     | NB    | B      | B     | NB    | NB    | B      | NB    | B     | NB     | B     | NB    | NB   | B     |
|----|-------|-------|-------|-------|--------|-------|-------|-------|--------|-------|-------|--------|-------|-------|------|-------|
|    | C1    | C2    | C3    | C4    | C5     | C6    | C7    | C8    | C9     | C10   | C11   | C12    | C13   | C14   | C15  | C16   |
| A1 | 29.48 | 346   | 9.61  | 3014  | 75.69  | 1E+08 | 3E+05 | 8E+05 | 8E+10  | 900   | 7E+12 | 23.04  | 3E+11 | 7E+07 | 5836 | 6E+12 |
| A2 | 35.28 | 795.2 | 12.96 | 3648  | 84.64  | 9E+07 | 2E+05 | 1E+06 | 4E+10  | 1225  | 3E+12 | 33.64  | 2E+11 | 5E+07 | 4597 | 9E+13 |
| A3 | 31.36 | 702.3 | 19.36 | 2704  | 84.64  | 8E+07 | 2E+05 | 9E+05 | 3E+10  | 1444  | 2E+12 | 42.25  | 2E+11 | 4E+07 | 3900 | 2E+12 |
| A4 | 33.41 | 660.5 | 9     | 707.6 | 84.64  | 1E+08 | 2E+05 | 1E+06 | 5E+10  | 1089  | 5E+12 | 29.16  | 2E+11 | 6E+07 | 5239 | 8E+13 |
| A5 | 34.22 | 718.2 | 12.74 | 1529  | 88.36  | 9E+07 | 2E+05 | 1E+06 | 3E+10  | 1296  | 3E+12 | 37.21  | 2E+11 | 5E+07 | 4440 | 7E+11 |
|    | 12.8  | 56.76 | 7.98  | 107.7 | 20.444 | 21814 | 1009  | 2291  | 489435 | 77.16 | 4E+06 | 12.857 | 1E+06 | 16457 | 155  | 1E+07 |

Table S10. Normalized Matrix.

| NM | B     | NB    | B     | NB    | B      | B      | NB    | NB    | B      | NB    | B      | NB     | B      | NB    | NB   | B      |          |
|----|-------|-------|-------|-------|--------|--------|-------|-------|--------|-------|--------|--------|--------|-------|------|--------|----------|
|    | C1    | C2    | C3    | C4    | C5     | C6     | C7    | C8    | C9     | C10   | C11    | C12    | C13    | C14   | C15  | C16    | Y        |
| A1 | 0.424 | 0.328 | 0.388 | 0.51  | 0.4255 | 0.5052 | 0.515 | 0.383 | 0.5874 | 0.389 | 0.5874 | 0.3733 | 0.5052 | 0.505 | 0.49 | 0.1812 | 0.108877 |
| A2 | 0.464 | 0.497 | 0.451 | 0.561 | 0.45   | 0.4357 | 0.431 | 0.468 | 0.413  | 0.454 | 0.413  | 0.4511 | 0.4357 | 0.436 | 0.44 | 0.7129 | 0.04074  |
| A3 | 0.438 | 0.467 | 0.551 | 0.483 | 0.45   | 0.4038 | 0.392 | 0.406 | 0.3329 | 0.492 | 0.3329 | 0.5056 | 0.4038 | 0.404 | 0.4  | 0.1004 | -0.53952 |
| A4 | 0.452 | 0.453 | 0.376 | 0.247 | 0.45   | 0.4618 | 0.463 | 0.5   | 0.4785 | 0.428 | 0.4785 | 0.42   | 0.4618 | 0.462 | 0.47 | 0.6667 | 0.385842 |
| A5 | 0.457 | 0.472 | 0.447 | 0.363 | 0.4598 | 0.4227 | 0.425 | 0.468 | 0.3803 | 0.467 | 0.3803 | 0.4745 | 0.4227 | 0.423 | 0.43 | 0.0661 | -0.48603 |

Table S11. Weighthed Normalized Matrix.

| W   | 0.067 | 0.058 | 0.072 | 0.063 | 0.0656 | 0.0541 | 0.069 | 0.067 | 0.0541 | 0.053 | 0.0541 | 0.0535 | 0.0541 | 0.071 | 0.07 | 0.0743 |          |
|-----|-------|-------|-------|-------|--------|--------|-------|-------|--------|-------|--------|--------|--------|-------|------|--------|----------|
| WNM | B     | NB    | B     | NB    | B      | B      | NB    | NB    | B      | NB    | B      | NB     | B      | NB    | NB   | B      |          |
|     | C1    | C2    | C3    | C4    | C5     | C6     | C7    | C8    | C9     | C10   | C11    | C12    | C13    | C14   | C15  | C16    | Y        |
| A1  | 0.029 | 0.019 | 0.028 | 0.032 | 0.0279 | 0.0273 | 0.035 | 0.026 | 0.0318 | 0.021 | 0.0318 | 0.02   | 0.0274 | 0.036 | 0.03 | 0.0135 | -0.00711 |
| A2  | 0.031 | 0.029 | 0.032 | 0.035 | 0.0295 | 0.0236 | 0.03  | 0.031 | 0.0224 | 0.024 | 0.0224 | 0.0241 | 0.0236 | 0.031 | 0.03 | 0.053  | 0.003094 |
| A3  | 0.029 | 0.027 | 0.04  | 0.03  | 0.0295 | 0.0219 | 0.027 | 0.027 | 0.018  | 0.026 | 0.018  | 0.027  | 0.0219 | 0.029 | 0.03 | 0.0075 | -0.03588 |
| A4  | 0.03  | 0.026 | 0.027 | 0.016 | 0.0295 | 0.025  | 0.032 | 0.034 | 0.0259 | 0.023 | 0.0259 | 0.0225 | 0.025  | 0.033 | 0.03 | 0.0495 | 0.020476 |
| A5  | 0.031 | 0.027 | 0.032 | 0.023 | 0.0302 | 0.0229 | 0.029 | 0.031 | 0.0206 | 0.025 | 0.0206 | 0.0254 | 0.0229 | 0.03  | 0.03 | 0.0049 | -0.0362  |

STEP 5

3

2

4

1

5

ABHA

JEDDAH

DAMMAM

RIYADH

ALAHSA
